# Supplementary material for: The nucleotide excision repair (NER) system of Helicobacter pylori: Role in mutation prevention and chromosomal import patterns after natural transformation
Source: PubMed Central journal article supplement (PMC3438104; doi:10.1186/1471-2180-12-67), 2012-05-06
Supplement: 1471-2180-12-67-S2.pdf [file 1471-2180-12-67-S2.pdf]

26695 AGAATGGAATTTGACTTGAAAGATCC<sup>760</sup>TC<sup>780</sup>CAAGGCAAG<sup>800</sup>GTTAT<sup>820</sup>TCTTTT<sup>840</sup>AGCGGGTAAAAAGCTCAGTTCAAG<sup>860</sup>AAAGATTAAAGA<sup>880</sup>GCTTAAAGAAAACCA 98  
 J99 AGAATGGAATTTGACTTGAAAGACCCGCAAGGCAAGATTATCCTTTTGGCGGGTAAAAAGCTCAGTTCAAGGAAAATTAAGAAGCTTAAAGAAAACCA 98  
 J99R3 AGAATGGAATTTGACTTGAAAGACCCGCAAGGCAAGATTATCCTTTTGGCGGGTAAAAAGCTCAGTTCAAGGAAAATTAAGAAGCTTAAAGAAAACCA 98

26695 TTTAGAATGGGTGGAATACCC<sup>860</sup>TATGGATATTTT<sup>880</sup>ACTCAATCG<sup>900</sup>CCATTAGCTGAGCCTGTTATGGTAGGGAAGAAGT<sup>920</sup>CTTATTGGACATGCTCAG<sup>940</sup>TC 196  
 J99 TTTAGAATGGGTGGAATACCC<sup>860</sup>TATGGATATTTT<sup>880</sup>ACTCAATCG<sup>900</sup>TCATTAGCTGAGCCTGTTATGGTAGGGAAGAAGT<sup>920</sup>TTTATTGGACATGCTCAG<sup>940</sup>CAC 196  
 J99R3 TTTAGAATGGGTGGAATACCC<sup>860</sup>TATGGATATTTT<sup>880</sup>ACTCAATCG<sup>900</sup>TCATTAGCTGAGCCTGTTATGGTAGGGAAGAAGT<sup>920</sup>TTTATTGGACATGCTCAG<sup>940</sup>CAC 196

26695 AGCTAGATAAAAAACA<sup>960</sup>AA<sup>980</sup>TTAGAAAAATCCACGAT<sup>1000</sup>TTAGGCGTGCAAGAATTTGTGATCATCAACGAT<sup>1020</sup>CTGGGTTAGGGCATGACGCTTCCATTATC 294  
 J99 AGTTGGATAAAAAACAGACTAGAAAAATCCACGAT<sup>980</sup>CTAGGCGTGCAAGAATTTGTGATCATCAACGATTTAGCGTTAGGGCATGACGCTTCCATTATC 294  
 J99R3 AGTTGGATAAAAAACAGACTAGAAAAATCCACGAT<sup>980</sup>CTAGGCGTGCAAGAATTTGTGATCATCAACGATTTAGCGTTAGGGCATGACGCTTCCATTATC 294

26695 CAATCTTTT<sup>1060</sup>TCAGCCGAT<sup>1080</sup>TCGTAGTCTTTGAAATT<sup>1100</sup>ACTCAAGCAAAAC<sup>1120</sup>CGAAAA<sup>1140</sup>AAATTGATGATGAAAACGCTCTAGCGGCGATT<sup>1160</sup>CGTATCCATAAGGT 392  
 J99 CATTCTTTT<sup>1060</sup>TCAGCCGAT<sup>1080</sup>TCGTAGTCTTTGAAATT<sup>1100</sup>GCTCAAGCAAACTGAAAAGATTGATGATGAAAACGCTCTAGCGGCGATT<sup>1160</sup>CGTATCCATAAGGT 392  
 J99R3 CATTCTTTT<sup>1060</sup>TCAGCCGAT<sup>1080</sup>TCGTAGTCTTTGAAATT<sup>1100</sup>GCTCAAGCAAACTGAAAAGATTGATGATGAAAACGCTCTAGCGGCGATT<sup>1160</sup>CGTATCCATAAGGT 392

26695 TATGAAACCAGGCGATCC<sup>1160</sup>CGTTACGACTGAAGTGGCTAAGCA<sup>1180</sup>GTTTGTCAA<sup>1200</sup>AAACTTTTCTTTGAT<sup>1220</sup>CCAGAACGCTATGATTTGACCATGGTGGGCC 490  
 J99 TATGAAACCAGGTGATCCTGTTACGACTGAAGTGGCTAAGCA<sup>1180</sup>ATTTGTTAAGAACTTTTCTTTGAT<sup>1200</sup>CCAGAACGCTATGATTTGACCATGGTGGGCC 490  
 J99R3 TATGAAACCAGGTGATCCTGTTACGACTGAAGTGGCTAAGCA<sup>1180</sup>ATTTGTTAAGAACTTTTCTTTGAT<sup>1200</sup>CCAGAACGCTATGATTTGACCATGGTGGGCC 490

26695 GCATGAAAAATGAATCACAAGT<sup>1260</sup>TAGGCTTGCATGTGCCTGATTACAT<sup>1280</sup>TACGACTTTAACGCATGAAGATATTATCACCACCGTTAAATACCTCATGAAG 588  
 J99 GTATGAAAAATGAATCACAAGT<sup>1260</sup>TAGGCTTGCATGTGCCTGATTACATCAGCAGCTTTAACGCATGAAGATATTATCACCACCGTTAAATACCTCATGAAG 588  
 J99R3 GTATGAAAAATGAATCACAAGT<sup>1260</sup>TAGGCTTGCATGTGCCTGATTACATCAGCAGCTTTAACGCATGAAGATATTATCACCACCGTTAAATACCTCATGAAG 588

26695 ATCAAAAACAATCA<sup>1340</sup>AGGCAAGATTGATGA<sup>1360</sup>CAGGGA<sup>1380</sup>CCACTTGGGCAATCGT<sup>1400</sup>TAGGATTAG<sup>1420</sup>GGCGGT<sup>1440</sup>AGGGAA<sup>1460</sup>TTGTTGGCCAATGAATTGCATTCAGG 686  
 J99 ATCAAAAACAATCAGGGCAAGATTGATGATAGGGATCACT<sup>1360</sup>TAGGCAATCGCAGGATCAGAGCCGTTGGGGAATATTGGCCAATGAATTGCATTCAGG 686  
 J99R3 ATCAAAAACAATCAGGGCAAGATTGATGATAGGGATCACT<sup>1360</sup>TAGGCAATCGCAGGATCAGAGCCGTTGGGGAATATTGGCCAATGAATTGCATTCAGG 686

26695 TTTAGTGAAAAATGCAAAGACCATTAAAGACAA<sup>1440</sup>CTCAC<sup>1460</sup>TACCATGAGCGGGGCTTTGATT<sup>1480</sup>CGCTCATGCCCCATGA<sup>1500</sup>CTTGGTCAATTCTAAAATGA 784  
 J99 CTTAGTGAAAAATGCAAAGACCATTAAAGACAA<sup>1440</sup>CTCAC<sup>1460</sup>TACCACCATGAGCGGGGCTTTGATT<sup>1480</sup>CGCTCATGCCCCATGATTTAGTCAATTTAAAATGA 784  
 J99R3 CTTAGTGAAAAATGCAAAGACCATTAAAGACAA<sup>1440</sup>CTCAC<sup>1460</sup>TACCACCATGAGCGGGGCTTTGATT<sup>1480</sup>CGCTCATGCCCCATGATTTAGTCAATTTAAAATGA 784

26695 TCAC<sup>1540</sup>AGCACCATCATGGAATTTT<sup>1560</sup>CATGGGCGGT<sup>1580</sup>CAGCTCTCGCAATT<sup>1600</sup>TATGGATCAAAC<sup>1620</sup>GAA<sup>1640</sup>TCC<sup>1660</sup>TTGAGTGAG<sup>1680</sup>GT<sup>1700</sup>TACG<sup>1720</sup>ACAAGCGCGCGCCTT 882  
 J99 TCACCAGCACCATCATGGAATTTT<sup>1540</sup>CATGGGCGGT<sup>1560</sup>CAGCTCTCGCAATT<sup>1580</sup>CATGGATCAAAC<sup>1600</sup>CAACCCTTTGAGTGAAGTTACG<sup>1620</sup>ACAAGCGACGCTT 882  
 J99R3 TCACCAGCACCATCATGGAATTTT<sup>1540</sup>CATGGGCGGT<sup>1560</sup>CAGCTCTCGCAATT<sup>1580</sup>CATGGATCAAAC<sup>1600</sup>CAACCCTTTGAGTGAAGTTACG<sup>1620</sup>ACAAGCGACGCTT 882

26695 TCAGCGCTCGG<sup>1640</sup>CGAAGGGGGGTT<sup>1660</sup>GGT<sup>1680</sup>GAAAGACAG<sup>1700</sup>AGT<sup>1720</sup>GGGTTTGAAGCCAGGGATGTGCACCCACGCATTATGGCCGAATTTGTCCCATTGA<sup>1740</sup>GAC 980  
 J99 TCAGCGCTCGGTGAAGGGGGGTTAGTCAAAGACAGGGTAGGGTTTGAAGCCAGGGATGTGCACCCACGCATTATGGCCGAATTTGTCCCATTGA<sup>1720</sup>GAC 980  
 J99R3 TCAGCGCTCGGTGAAGGGGGGTTAGTCAAAGACAGGGTAGGGTTTGAAGCCAGGGATGTGCACCCACGCATTATGGCCGAATTTGTCCCATTGA<sup>1720</sup>GAC 980

26695 CCCAGAAGGTCAA<sup>1740</sup>AAATATCGGT<sup>1760</sup>CTGATCAACACCCCTTTCCACTTTCAACAAGAGTGAATGATTTAGGCTTTATTGAAGCCCTTATAAAAAGGTTGTGG 1078  
 J99 CCCAGAAGGTCAA<sup>1740</sup>AAATATCGGT<sup>1760</sup>CTGATCAACACCCCTTTCCACTTTCAACAAGAGTGAATGATTTAGGCTTTATTGAAGCCCTTATAAAAAGGTTGTGG 1078  
 J99R3 CCCAGAAGGTCAA<sup>1740</sup>AAATATCGGT<sup>1760</sup>CTGATCAACACCCCTTTCCACTTTCAACAAGAGTGAATGATTTAGGCTTTATTGAAGCCCTTATAAAAAGGTTGTGG 1078

26695 ATGGCAAGGT<sup>1840</sup>CGTGGG<sup>1860</sup>TGAGACGATTTATTTGACCGCTATTCAAGAAGACAGCCACATCATCGCTCCCGCAAGCACC<sup>1880</sup>CCCATTTGATGAAGA<sup>1900</sup>G<sup>1920</sup>GGGAAT 1176  
 J99 ATGGCAAGGTGGCGGGCGAGACGATTTATTTGACCGCTATTCAAGAAGACAGCCACATCATCGCTCCCGCAAGCACC<sup>1880</sup>CCCATTTGATGAAGA<sup>1900</sup>G<sup>1920</sup>GGGAAT 1176  
 J99R3 ATGGCAAGGTGGCGGGCGAGACGATTTATTTGACCGCTATTCAAGAAGACAGCCACATCATCGCTCCCGCAAGCACC<sup>1880</sup>CCCATTTGATGAAGA<sup>1900</sup>G<sup>1920</sup>GGGAAT 1176

26695 ATTTT<sup>1940</sup>GGGCGATTTGATTGAAACCGCG<sup>1960</sup>CTGGAAGGCGAGATCGTTTTAAACGAAAA<sup>1980</sup>AG<sup>2000</sup>CAAAGT<sup>2020</sup>ACCTTAATGGATTTAAGCTCTAGCATGCTAGT 1274  
 J99 ATTTT<sup>1940</sup>AGGCGATTTGATTGAAACCGCG<sup>1960</sup>AGTGAAGGCGAGATCGTTTTAAACGAAAA<sup>1980</sup>AGTAAAGT<sup>2000</sup>TACCTTAATGGATTTAAGCTCTAGCATGCTAGT 1274  
 J99R3 ATTTT<sup>1940</sup>AGGCGATTTGATTGAAACCGCG<sup>1960</sup>AGTGAAGGCGAGATCGTTTTAAACGAAAA<sup>1980</sup>AGTAAAGT<sup>2000</sup>TACCTTAATGGATTTAAGCTCTAGCATGCTAGT 1274

26695 GGGGGTAGCCGCATCGCTCATTCTTTCTTAGAGCATGATGACGC<sup>2040</sup>CAACCG<sup>2060</sup>TGC<sup>2080</sup>CTTAATGGGACTAACATGCAGCGCCAAGC<sup>2100</sup>GGTGC<sup>2120</sup>CTTATTTAA 1372  
 J99 AGGGGTAGCCGCATCGCTCATTCTTTCTTAGAGCATGATGACGC<sup>2040</sup>CAACCG<sup>2060</sup>TGC<sup>2080</sup>CTTAATGGGACTAACATGCAGCGCCAAGC<sup>2100</sup>GGTGC<sup>2120</sup>CTTATTTAA 1372  
 J99R3 AGGGGTAGCCGCATCGCTCATTCTTTCTTAGAGCATGATGACGC<sup>2040</sup>CAACCG<sup>2060</sup>TGC<sup>2080</sup>CTTAATGGGACTAACATGCAGCGCCAAGC<sup>2100</sup>GGTGC<sup>2120</sup>CTTATTTAA 1372

26695 GAAGCGACGCT<sup>2140</sup>CCCATTTGTAGGCACGGGATTGAAAAAATTTAT<sup>2160</sup>TGCTAGGGATTCTTGGGGAGCGATCAA<sup>2180</sup>AGCCAATCGCGCAGGCGTTGTAGAAAAA 1470  
 J99 GAAGCGACGCCCCCATTTGTAGGCACAGGGATTGAAAAAATTTATCGCTAGGGATTCTTGGGGAGCGATCAAAGCCAATCGCGCAGGCGTTGTAGAAAAA 1470  
 J99R3 GAAGCGACGCCCCCATTTGTAGGCACAGGGATTGAAAAAATTTATCGCTAGGGATTCTTGGGGAGCGATCAAAGCCAATCGCGCAGGCGTTGTAGAAAAA 1470

26695 ATTGATTCTAAAAA<sup>2240</sup>TATTTA<sup>2260</sup>TATTTTAGGCGAA<sup>2280</sup>AGCAAAGAAGAAGCCTATATTGAT<sup>2300</sup>TGCGTATTCTTTGCAAAAAA<sup>2320</sup>ACTTGGCCACCAACCAAAACAC 1568  
 J99 ATTGATTCTAAAAACATTTACATTTTAGGCGAAGGCAAAGAAGAAGCCTATATTGACGCGTATTCTTTGCAAAAAA<sup>2300</sup>ACTTGGCCACCAACCAAAACAC 1568  
 J99R3 ATTGATTCTAAAAACATTTACATTTTAGGCGAAGGCAAAGAAGAAGCCTATATTGACGCGTATTCTTTGCAAAAAA<sup>2300</sup>ACTTGGCCACCAACCAAAACAC 1568

26695 CAGTTTCAATCAAGTCCCTATCGTTAAAGTGGGCGATAAAGTGG<sup>2320</sup>GAGCCGGGCAAAATCATCGCTGATGGCCCTAGCATGGATAG<sup>2340</sup>AGGCGAGTTAG 1663  
 J99 CAGTTTCAATCAAGTCCCTATCGTTAAAGTGGGCGATAAAGTGG<sup>2320</sup>GAGCCGGGCAAAATCATCGCTGATGGCCCTAGCATGGATAG<sup>2340</sup>AGGCGAGTTAG 1663  
 J99R3 CAGTTTCAATCAAGTCCCTATCGTTAAAGTGGGCGATAAAGTGG<sup>2320</sup>GAGCCGGGCAAAATCATCGCTGATGGCCCTAGCATGGATAG<sup>2340</sup>AGGCGAGTTAG 1663
