# Supplementary material for: The nucleotide excision repair (NER) system of Helicobacter pylori: Role in mutation prevention and chromosomal import patterns after natural transformation
Source: BMC Microbiol. 2012 May 6;12:67. doi: 10.1186/1471-2180-12-67 (PMC3438104; doi:10.1186/1471-2180-12-67)
Supplement: Additional file 3 — Figure S3. Amino acid sequence alignments of the four NER components, UvrA, UvrB, UvrC and UvrD. The primary sequences from H. pylori 26695, C. jejuni NCTC11168, E. coli K12 and S. aureus N315 were aligned by performing a muscle alignment [51] using CLC Sequence Viewer v6.6.1. A. UvrA (H. pylori 26695 HP0705, C. jejuni NCTC11168 Cj0342c, E. coli K12 EG11061 and S. aureus N315 SA0714). B. UvrB (H. pylori 26695 HP1114, C. jejuni NCTC11168 Cj0680c, E. coli K12 EG11062 and S. aureus N315 SA0713. C. UvrC (H. pylori 26695 HP0821, C. jejuni NCTC11168 Cj1246c, E. coli K12 EG11063 and S. aureus N315 SA0993). D. UvrD (H. pylori 26695 HP1478, C. jejuni NCTC11168 Cj1101, E. coli K12 EG11064 and S. aureus N315 SA1721). The UvrD equivalent protein in Gram positive bacteria is known as PcrA. Amino acids conserved in three or all four orthologs are labelled with light or dark blue shading, respectively. [file 1471-2180-12-67-S3.pdf]

Figure 1. Multiple sequence alignment of the deduced amino acid sequences of the *hsp70* gene from *Helicoverpa armigera* (Hp\_26695), *C. NICTC* (Cj\_NCTC\_11168), *Ec* K12 (Ec\_K12), and *Sa* N315 (Sa\_N315). The alignment shows conserved regions across the four species, with positions 1 to 918 indicated on the right. The sequences are color-coded: blue for conserved regions and red for variable regions.

# B

Figure 1. Multiple sequence alignment of the deduced amino acid sequences of the *C. jejuni* NCTC 11168, *Ec. coli* K12, and *Salmonella enterica* N315 *hlyE* genes. The alignment shows conserved regions across the three species, with positions 100, 200, 300, 400, 500, 600, and 700 marked. The sequences are color-coded: blue for conserved regions and red for variable regions. The alignment is presented in a grid format with the following columns and rows:

| Species       | 100               | 200               | 300               | 400               | 500               | 600               | 700               |
|---------------|-------------------|-------------------|-------------------|-------------------|-------------------|-------------------|-------------------|
| Hp_26695      | HP_26695_100      | HP_26695_200      | HP_26695_300      | HP_26695_400      | HP_26695_500      | HP_26695_600      | HP_26695_700      |
| Cj_NCTC_11168 | Cj_NCTC_11168_100 | Cj_NCTC_11168_200 | Cj_NCTC_11168_300 | Cj_NCTC_11168_400 | Cj_NCTC_11168_500 | Cj_NCTC_11168_600 | Cj_NCTC_11168_700 |
| Ec_K12        | Ec_K12_100        | Ec_K12_200        | Ec_K12_300        | Ec_K12_400        | Ec_K12_500        | Ec_K12_600        | Ec_K12_700        |
| Sa_N315       | Sa_N315_100       | Sa_N315_200       | Sa_N315_300       | Sa_N315_400       | Sa_N315_500       | Sa_N315_600       | Sa_N315_700       |

C

|               |         |         |           |               |             |              |                 |                  |                 |                  |               |                      |                               |              |               |                         |
|---------------|---------|---------|-----------|---------------|-------------|--------------|-----------------|------------------|-----------------|------------------|---------------|----------------------|-------------------------------|--------------|---------------|-------------------------|
|               |         | 20      |           | 40            |             | 60           |                 | 80               |                 |                  |               |                      |                               |              |               |                         |
| Hp_26695      | ---     | MADLLSS | LKNLPNSS  | GVYQYFDKNRQLL | YIGKAKNL    | LKKRIKSYFS   | IRNNEITPNHRAS   | LRIQMMVKQIAFLET  | ILVENEQDAL      | I LENS L 89      |               |                      |                               |              |               |                         |
| Cj_NCTC_11168 | LT--    | KENLENE | LKTLPNST  | GVYQYFNQEGKLL | YVGKAKNL    | LKNRVRSY     | FAFTPN-LHANPRNS | LRIQKMI EETVHLEF | IATNSEADAL      | I LENS F 90      |               |                      |                               |              |               |                         |
| Ec_K12        | VSD-Q   | FDAAKAF | LKTVTSQP  | GVYRMYDAGGTVI | YVGKAKD     | LKKRLSS      | YFRSNLA-----    | SRKTEALVAQIQQID  | VTVTHTETEAL     | L L E H N Y 84   |               |                      |                               |              |               |                         |
| Sa_N315       | LEDYKQR | IKNKL   | LVVPMEP   | GCYLMKDRNDQVI | YVGKAKKL    | LRNRLRSY     | FTGAHD-----     | AKTTRLVGEIRRF    | EFIVTSSETES     | L L L E L N L 84 |               |                      |                               |              |               |                         |
|               |         | 100     |           | 120           |             | 140          |                 | 160              |                 | 180              |               |                      |                               |              |               |                         |
| Hp_26695      |         | IKQLKP  | KYNILLR   | DDKTYPI       | IYMD        | FSTDFPI      | PLITRKIL        | KQPGVKYFGP       | FTSG--AKDILDS   | LYELLPLVQ        | KKNCIK--DKKAC | IFYQIERCK 178        |                               |              |               |                         |
| Cj_NCTC_11168 |         | IKQLHP  | KYNILLR   | DDKTYPI       | IYVDF       | EEFPRFEI     | TRKLV           | KKSKIYFGP        | FFFKG--ARELLDAL | YLYYPLKQ         | KASC---KSPC   | IFYQISRCL 176        |                               |              |               |                         |
| Ec_K12        |         | IKLYQPR | YNVLLR    | DDKSYPFI      | FLS-GDTH    | PRLAMHRG     | -AKHAKGEY       | FGFPFNGYAVRET    | LALLQKIFP       | IRQCENS          | VYRNSRPLQY    | QIGRCL 175           |                               |              |               |                         |
| Sa_N315       |         | IKQYQPR | YNILLK    | DDKSYPFI      | KIT-KEKY    | PRLLVTRT     | -VKQGTGKY       | FGPPNAYS AQET    | TKKLDR          | IYPRKCDKM---     | PDKLCLY       | YHIGQCL 171          |                               |              |               |                         |
|               |         | 200     |           | 220           |             | 240          |                 | 260              |                 |                  |               |                      |                               |              |               |                         |
| Hp_26695      |         | APC-ENK | ITKEEY    | LKIAKE        | CLEMIENKDR  | -LIKELEL     | KMERLSNNLR      | FEEAL IYRDRI     | AKIQKIAP        | FTCMDLAKLY       | DLDIFAFY      | GASNKAVLV 269        |                               |              |               |                         |
| Cj_NCTC_11168 |         | APC-DKL | ISREKY    | LEILDEA       | IHALLNPSV   | -LLKNLEKQ    | MLVLAQ          | NENYEEAAKVRDQ    | IAMIKD          | LEVKVEIDI        | AKLED         | FEVFALAFKNSVLSTL 267 |                               |              |               |                         |
| Ec_K12        |         | GPCVEGL | VSEEEY    | AQQVEY        | VRLF LSGKDD | QVLTQL       | ISRMETASQ       | NLEFEEAARI       | RDQIQAVRRV      | TEKQFV           | SNTG-DDLDV    | IGVAFDAGMACVH 267    |                               |              |               |                         |
| Sa_N315       |         | GPC-VYD | VL SKY    | AQMTKE        | ITDF LNGEDK | ILKSLEER     | MLTASES         | LDFERAKEY        | RDLIQH          | IQLNTN           | KQKIMSSDKT    | IRDFVGYCVDKGWMC      | I Q 263                       |              |               |                         |
|               |         | 280     |           | 300           |             | 320          |                 | 340              |                 | 360              |               |                      |                               |              |               |                         |
| Hp_26695      |         | KMFMRG  | GKIIIS--  | SAFEK         | IHSLNG      | FDTDEAMQ     | QAI INHY--QSH   | PLMPEQILL        | NACSNETL        | KELOEF           | ISHQYSK       | KIALSIPKKG           | GDKLALIEI 358                 |              |               |                         |
| Cj_NCTC_11168 |         | RFVVQNG | GKIIISANS | KITPIK        | NDIQWDQNE   | IYKQLILENF-- | SMDIPL          | LANVIYVYEE       | FEDRVL-LEE      | ILSQR            | FDKKISIKIP    | KPIGEKRR             | ICDL 357                      |              |               |                         |
| Ec_K12        |         | VLFI    | RQGV      | LGSRSY        | FPKVPG--GT  | ELSEVVET     | FVGQFY          | LQGSQMRT         | LPGEILL         | DFNLS            | DKTL-LADSL    | SELAGRK              | INVQTKPRG                     | DRARYLKL 357 |               |                         |
| Sa_N315       |         | VFFI    | RQGNMI    | KRDTTMI       | PLQ---QTEEE | EFY-TFI      | GQFY--SLNQ      | HL PKEV          | HVPRNLD----     | KEMI             | QSVVDTKIV--   | QPARGP               | KKDMVDL 342                   |              |               |                         |
|               |         | 380     |           | 400           |             | 420          |                 | 440              |                 | 460              |               |                      |                               |              |               |                         |
| Hp_26695      |         | AMKNAQE | IFSQE     | KTSNED        | LILEEARS    | LFKLECM----- | P--YRVE         | IFDTS            | SHSSSQCV        | GGMVVYEN         | NAFQKNS       | YRRYHL               | KG--SDEY                      | TQ 438       |               |                         |
| Cj_NCTC_11168 |         | AFQNA   | LLNIEKE   | QKNH          | DFTIQKEL    | KSYFEL       | ENL-----        | P--NDIE          | IFDN            | SHLQGVAN         | VGAMV         | TYRINS               | WDKSKYRK                      | FHLKH--KNDY  | DQ 437        |                         |
| Ec_K12        |         | ARTNA   | AALT      | SKLSQ         | STVHQ       | RALTALAS     | VLKL-----       | PEVKRMEC         | FDISHT          | MGEQTV           | ASCVV         | FDANG                | PLRAEY                        | RRYNTG       | ITPGDDYAA 441 |                         |
| Sa_N315       |         | AAHNA   | KVSLNN--  | KFEL          | ISRDES      | RTIKAEEL     | GTQMGIQT        | P--IRIEA         | FDNSNI          | QGVDP            | V SAMVTF      | V D G K P D K K N    | Y R K Y K I K T V K G P D D Y | K S 430      |               |                         |
|               |         | 480     |           | 500           |             | 520          |                 | 540              |                 |                  |               |                      |                               |              |               |                         |
| Hp_26695      |         | MSELLT  | R R R     | ---ALD        | FAKEPP      | NLWVID       | GGRAQLNIA       | LEILK-SSGS       | FVE---VIA       | ISKEK            | RDSKAYRS      | KGGAKD               | IHTPSD                        | T-FKL        | LPSDK 521     |                         |
| Cj_NCTC_11168 |         | MREVL   | T R R     | ---ALD        | FDKIP       | PPDLWL       | IDGGKALL        | DLAKEIV-SSG      | VNVD---ILA      | ISKEK            | IDAKAHR       | KGGAKD               | KIHS                          | LKGE-FSL     | SINDK 520     |                         |
| Ec_K12        |         | MNQVL   | R R R     | Y G K A I     | DDSKI--PDV  | ILIDGG       | KGQLAQAK        | NVFA-ELDV        | SWDKNH          | PLLGL            | VAKGA-----    | DRKAG                | LET                           | LF           | FEPEGE        | GFSLPPDSP 525           |
| Sa_N315       |         | MREVVR  | R R R     | YSRVLN        | -EGLPL      | PDLII        | VDGGKG          | HMNGVIDV         | LQNEL           | GLDIP----        | VAGLQ         | KND-----             | KHQT                          | SELLY        | GASAEIV       | PLKKNSQ 509             |
|               |         | 560     |           | 580           |             | 600          |                 | 620              |                 | 640              |               |                      |                               |              |               |                         |
| Hp_26695      |         | RLQWV   | QKL       | RDESH         | RYAIFN      | FHRSTKL      | KNMKQIAL        | LKEKGIGE         | ASVKKLLD        | YFGSFEA          | IEKASE        | QEKNAV-----          | LKKRI                         | -----        | 594           |                         |
| Cj_NCTC_11168 |         | KLQFL   | QKL       | RDEA          | H R F A I   | SFHQNT       | KKKQDL          | KSSKLANL         | GLSSG           | VMQKLL           | AYYGN         | FESIYK               | ADF                           | KDLT         | ML--VGR       | KAAQKIKEN--- 600        |
| Ec_K12        |         | ALHVI   | QH        | IRDES         | H D H A I   | GGHR         | KKRAK           | VKNTSS           | LETIEG          | VGP              | KRRQML        | LLKYM                | GGLQ                          | GLRN         | ASVEEIA       | KVPGISQGLAEKIFWSLKH 610 |
| Sa_N315       |         | AFYLL   | HRIQ      | DEVH          | RFAITF      | HRQTRQ       | KTGLKS          | ILDDIDG          | IGNKR           | KTLL             | LLRSFG        | SIKKMKEA             | TLED                          | FKNI-G       | IPENV         | AKNLHEQLHK 593          |

D

|               |                                                                                                                                                                                |     |     |     |     |    |  |    |  |
|---------------|--------------------------------------------------------------------------------------------------------------------------------------------------------------------------------|-----|-----|-----|-----|----|--|----|--|
|               |                                                                                                                                                                                | 20  |     | 40  |     | 60 |  | 80 |  |
| Hp_26695      | -----SHIQGPLLILAGAGSGKTKTLTSLAYLIGVCGVPSENTLTLTFTNKAASKEMQERALKLKNQALIPPLLC <sup>TFHR</sup> 75                                                                                 |     |     |     |     |    |  |    |  |
| Cj_NCTC_11168 | --MNLFEDLNDKQKQAVSHIDGAMLILAGAGSGKTKTITTRLAYLIGVEGIPSHNTLTLTFTNKAASVMRHRALNFLQGNHN--P <sup>LLCTFHK</sup> 88                                                                    |     |     |     |     |    |  |    |  |
| Ec_K12        | MDVSYLLDSLNDKQREAVAAPRSNLLVLAGAGSGKTRVLVHRIAWLMSVENCSPPYSIMAVTFTNKA <sup>AAEMRHRIGQLMGTSQGG-MWVGTFHG</sup> 92                                                                  |     |     |     |     |    |  |    |  |
| Sa_N315       | --MNALLNHMNT <sup>EQSEAVKTT</sup> EGPLLIMAGAGSGKTRVLTHRIAYL <sup>LDEKDVSPYNVLAIFTNKAAREMKERVQKLVGDQAEV-IWMSTFHS</sup> 90                                                       |     |     |     |     |    |  |    |  |
|               | 100                                                                                                                                                                            | 120 | 140 | 160 | 180 |    |  |    |  |
| Hp_26695      | FGLLFLRQHMNLLK <sup>RACD</sup> FSVLDSDEVKTLCKQLKIS-----NFRASISQIKNGMMDLS-----MQDSECY-----K 137                                                                                 |     |     |     |     |    |  |    |  |
| Cj_NCTC_11168 | FGLLFLKLHFERLERKNSFIVIDTDDTKKIKDLIHDKNKDNVY---DIIQYISYCKNEGKRVSNVFEDLNLKEHNF <sup>EKYQNEY--KFAN</sup> 174                                                                      |     |     |     |     |    |  |    |  |
| Ec_K12        | LAHRLRAHHMDANLPQDFQILDSEDLRLLRLIKAMNLDEKQWP <sup>PRQAMWYINSQKDEGLR-----PHHISYGNPV-EQTWQK</sup> 172                                                                             |     |     |     |     |    |  |    |  |
| Sa_N315       | MCVRI <sup>LRRDADRIGIERNFTIIDPTDQKSVIKDVLKNENIDSKKFEPRMFIGAISNLKNE</sup> LKT-----PADAQKEATDYHSQMVAT 171                                                                        |     |     |     |     |    |  |    |  |
|               | 200                                                                                                                                                                            | 220 | 240 | 260 |     |    |  |    |  |
| Hp_26695      | AYELYQNALKKDNLV <sup>DFDDL</sup> LLFLSLKILQDNETIAKETSERHYHIMVDEYQDTNALQLEFLKKLSFTHHNL <sup>CVVGDDQDSIYGFRGADISN</sup> IL 230                                                   |     |     |     |     |    |  |    |  |
| Cj_NCTC_11168 | YYRAYEYLLKQNFV <sup>DFDDL</sup> LLLSNLILENDINFAKEQSLLYNYITVDEYQDTNTLQYIKLNLCCMHENITVVGDDQDSI <sup>YSWRGAKIEN</sup> IL 267                                                      |     |     |     |     |    |  |    |  |
| Ec_K12        | VYQAYQEACDRAGLV <sup>DFAE</sup> LLRAHELWLNKPHILQHRYRERFNTILVDEFQDTNNIQYAWIRL <sup>LAGDTGKVMIVGDDQDSIYGWRGAQVENIQ</sup> 265                                                     |     |     |     |     |    |  |    |  |
| Sa_N315       | VYSGYQ <sup>RQLSRNEALDFDDL</sup> IMTTINL <sup>FERVPEVLEYQNKQFYIHVDEYQDTNKAQYTLVKLLASKFKNL</sup> CVVGSDQSIY <sup>GWRGADIQN</sup> IL 264                                         |     |     |     |     |    |  |    |  |
|               | 280                                                                                                                                                                            | 300 | 320 | 340 | 360 |    |  |    |  |
| Hp_26695      | NFSKHFGKAKIVK <sup>LETNYR</sup> SSAEILACANSLISHNQHRHIKTQSFKGSHKSVVCKEYLTQKEESLDVAYQIKALLKKGENLENIA <sup>ILYRLNG</sup> 323                                                      |     |     |     |     |    |  |    |  |
| Cj_NCTC_11168 | NFQNDFKNVKLVK <sup>LEQNYR</sup> SVGTILQAANSLISHNEQRLGKTLICTKDTGENIKILKNENEKDEGLYIAQEVKKLLNSVEAKEIA <sup>ILFRVNA</sup> 360                                                      |     |     |     |     |    |  |    |  |
| Ec_K12        | RFLNDFPGAETIR <sup>LEQNYR</sup> STSNLSAANAL <sup>IENNNGRLGKKLWTDGADGEPISLYCAFNE</sup> LDEARFVNNRIKTWQDNGGALAECAL <sup>ILYRSNA</sup> 358                                        |     |     |     |     |    |  |    |  |
| Sa_N315       | SFEKDYPEANTIF <sup>LEQNYR</sup> STKTILNAANEVINKNSERKPKGWTANTNGEKIHYYEAMTERDEAEFVIREIMKHQRNG <sup>KKYQDMAILYRTNA</sup> 357                                                      |     |     |     |     |    |  |    |  |
|               | 380                                                                                                                                                                            | 400 | 420 | 440 | 460 |    |  |    |  |
| Hp_26695      | LSRSIEESLNALNIPYRLIGALSFYERA <sup>EIKDAL</sup> AFMHLVAKKDDRFFIKRVLNKP <sup>PRGLGKI</sup> TQEWIFSL <sup>LDEEGLNLEEAL</sup> KLGA <sup>FKDKL-</sup> 415                           |     |     |     |     |    |  |    |  |
| Cj_NCTC_11168 | LSRAIEEAFMKKQISYKLLSGMRFYERLEIKDLISYLRILNPSDDLSFKRIINRPKRSIGEKALKNLEEYAKKRQISLFDALCESDGGVGIL 453                                                                               |     |     |     |     |    |  |    |  |
| Ec_K12        | QSRVLEEALLQASMPYRIYGGMRFFERQEIKDALSYLRLIANRNDAAFERVVNTPTRGIGDRTLDVVRQTSRDRQLTLWQACRELLQEAL 450                                                                                 |     |     |     |     |    |  |    |  |
| Sa_N315       | QSRVLEEETFMKSNMPYTMVGGQKFYDRKEIKDLISYLRIANSNDDISLQRIINVPKRGVGPSSVEKVQNYALQNNISMFDALGEADF-IGL- 448                                                                              |     |     |     |     |    |  |    |  |
|               | 480                                                                                                                                                                            | 500 | 520 | 540 |     |    |  |    |  |
| Hp_26695      | -NPKNEYALKQFIAMIGRL-REAFEISVEEFCSRFLEETNLLKSYEKEDNYEEREGF-VKELLTLVKEYFKTNPT--HSLD <sup>FLNESV</sup> LDA 501                                                                    |     |     |     |     |    |  |    |  |
| Cj_NCTC_11168 | TTKKAQNEANIFIQNIHTLKS <sup>YDN</sup> AKKVFDNIEELFKIKDYFS--EQDDGDE--RIRNLDEFYANLREKLKEDPE--ASLEDLLSEISLLS 538                                                                   |     |     |     |     |    |  |    |  |
| Ec_K12        | -AGRAASALQRFMELIDALAQETAD <sup>MLHVQ</sup> TD <sup>RV</sup> IKDSGLRTMYEQEKGEKGQTR <sup>IENTLE</sup> LV <sup>TAT</sup> RQFSYNEEDEDL <sup>MP</sup> LQAFLSHA <sup>LEA</sup> 542   |     |     |     |     |    |  |    |  |
| Sa_N315       | -SKKV <sup>TQEC</sup> LN <sup>FYELIQSL</sup> IK <sup>EQEF</sup> LEIHEIVDEV <sup>LQKSGYREMLERENTLES</sup> RSL <sup>ENIDEFMSVPKDY</sup> EENTPLEE-QSLINFL <sup>TDL</sup> SLVA 539 |     |     |     |     |    |  |    |  |
|               | 560                                                                                                                                                                            | 580 | 600 | 620 | 640 |    |  |    |  |
| Hp_26695      | HNTEN--AQKYSCMSVHMSKGLEFKHVFVIGLEEGFFPHRGF--NQESDLEEERRLAYVAITRAKEELQLSYVKERSYFGRKISCS <sup>PSVFL</sup> 588                                                                    |     |     |     |     |    |  |    |  |
| Cj_NCTC_11168 | DQDNLD--EECVCLMSIHASKGLEFDYVFIGFDEGFFPL-----NSEENLEEERRLAYVAITRAKKFLTISVANSRFYHGSRANIN <sup>PSRFL</sup> 623                                                                    |     |     |     |     |    |  |    |  |
| Ec_K12        | GEGQADTWQDAVQLMTLHSAKGLEFPQVFIGMEEGMFPSQMSL-DEGGRL <sup>EEERRLAYVGVTRAMQKLT</sup> LT <sup>YAE</sup> TRRLYGKEVYHR <sup>PSRFL</sup> 633                                          |     |     |     |     |    |  |    |  |
| Sa_N315       | DIDEADT-ENGVTLMTHSAKGLEFPVFIGMEESLFPHIRAIKSEDDHEM <sup>QEERRICYVAITRAEEVLYITHATSRMLFGRPQSNMPSRFL</sup> 631                                                                     |     |     |     |     |    |  |    |  |
|               | 660                                                                                                                                                                            | 680 | 700 | 720 | 740 |    |  |    |  |
| Hp_26695      | EE-----AQLLNQDNPPKQDHQKDAPIKVGD <sup>LIRHKIFGTGRV</sup> LGVEKGLSGLCLKINC <sup>GGNVYDKISEKFVE</sup> 656                                                                         |     |     |     |     |    |  |    |  |
| Cj_NCTC_11168 | EE-----SKLINEK--SKNQNIQKTSFCKGD <sup>LVKHKIFGIGRV</sup> VEANKSGKEEKL <sup>INIFGG-IMRVIMAS</sup> FVE 688                                                                        |     |     |     |     |    |  |    |  |
| Ec_K12        | GELPEECVE-----EVL <sup>RATVSRPVSHQRMGTPMVENDSGYKLQQRVRHAKFEG</sup> ITV <sup>NMEGS</sup> GEHSRLQVAF <sup>QGGQIKWLVA</sup> AYAR 716                                              |     |     |     |     |    |  |    |  |
| Sa_N315       | KEIPESLLENHSSGKRQTIQPKAKPFAKRGFSQRTTSTKKQVSSSDWNVGD <sup>KVMHKA</sup> WGE <sup>GMVSNVNEKNGSIEDIIFKSQGP</sup> KRLLAQFAP 724                                                     |     |     |     |     |    |  |    |  |
|               | 660                                                                                                                                                                            | 680 | 700 | 720 | 740 |    |  |    |  |
| Hp_26695      | KVDNGF 662                                                                                                                                                                     |     |     |     |     |    |  |    |  |
| Cj_NCTC_11168 | KAV--- 691                                                                                                                                                                     |     |     |     |     |    |  |    |  |
| Ec_K12        | LESV-- 720                                                                                                                                                                     |     |     |     |     |    |  |    |  |
| Sa_N315       | IEKKED 730                                                                                                                                                                     |     |     |     |     |    |  |    |  |
